# Supplementary material for: An upconversion nanocomposite for fluorescence resonance energy transfer based cholesterol-sensing in human serum
Source: Royal Society of Chemistry journal article supplement (doi:10.1039/c4nr04380d), 2014-10-09
Supplement: c4nr04380d1.pdf [file c4nr04380d1.pdf]

Supporting Information for

**An Upconversion Nanocomposite for Fluorescence Resonance Energy Transfer Based Cholesterol-Sensing in Human Serum**

Yujie Ding,<sup>ab</sup> Hao Zhu,<sup>a</sup> Xiaoxia Zhang,<sup>a</sup> Jiangang Gao,<sup>b</sup> E. S. Abdel-Halim,<sup>c</sup> Liping Jiang<sup>\*a</sup> and Jun-Jie Zhu<sup>\*a</sup>

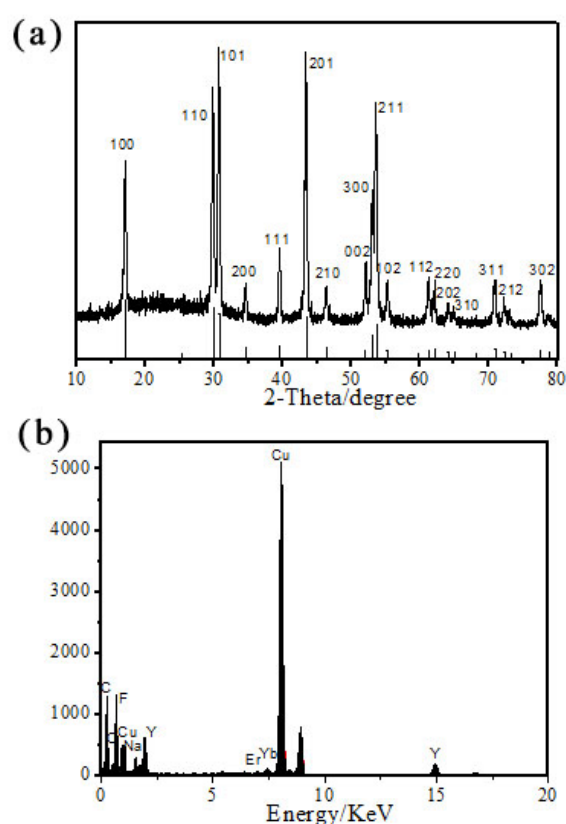

Fig. S1 XRD patterns of the as-synthesized OA-UCNPs (straight lines show the standard pattern of pure hexagonal NaYF<sub>4</sub>, JCPDS No. 28-1192) (a), the EDX of OA-UCNPs (b).

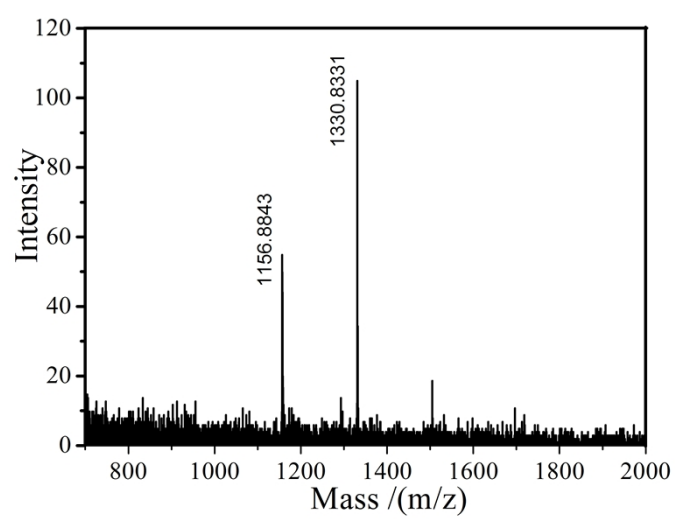

Fig. S2 MS of CD-Cit in aqueous solution

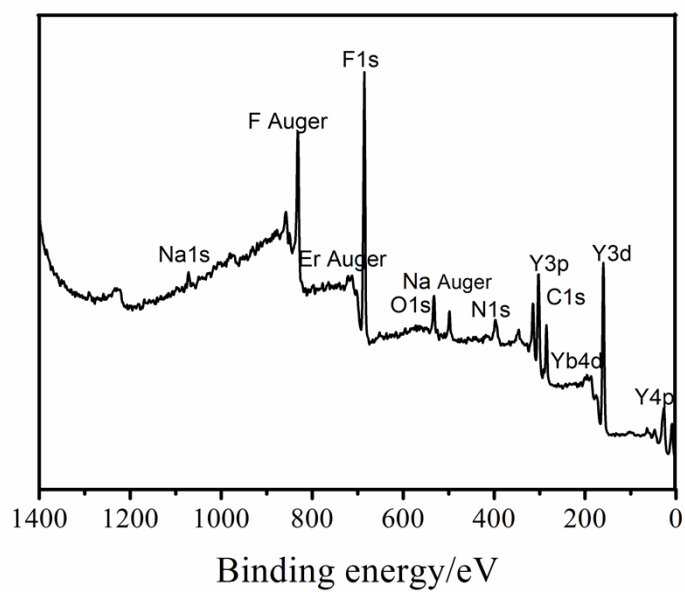

Fig. S3 XPS spectrum of RB-CD-Cit-UCNPs

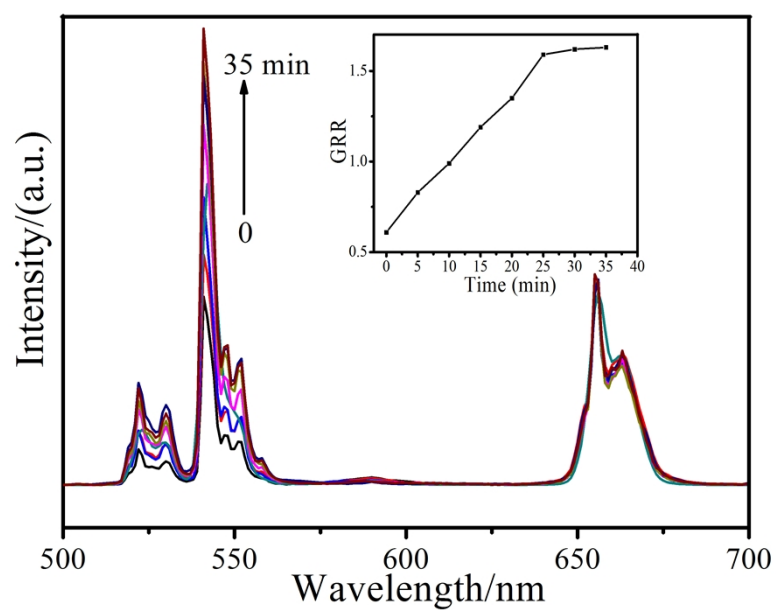

Fig. S4 UCL spectra were recorded from 0 to 35 min when 80  $\mu$ M Cho was introduced to 0.5 mg/mL RB-CD-Cit-UCNPs in the Tris-HCl buffer solutions (pH= 7.4), inset is the relative intensity (GRR) as a function of reaction time.
